# Supplementary material
Source: Elsevier journal article supplement (https://www.sciencedirect.com/science/article/pii/S021169952200087X)
Supplement: mmc1 [file S021169952200087X:mmc1.pdf]

## ENCUESTA DE LA SOCIEDAD ESPAÑOLA DE NEFROLOGÍA PARA ANALIZAR LA IMPORTANCIA DEL PRURITO ASOCIADO A ENFERMEDAD RENAL CRÓNICA

Desde la Junta Directiva de la Sociedad Española de Nefrología, nos gustaría saber la situación actual respecto a un síntoma a veces invalidante en nuestros pacientes como es el prurito asociado a ERC. Para ello os invitamos a rellenar esta brevísima encuesta que os llevara menos de 2 minutos. La información derivada de la misma será de gran interés para todos los profesionales de nuestra sociedad y nos permitirá conocer aspectos sobre esta sintomatología que han sido poco abordados en la literatura actual.

1. Sexo:
  - a. Varón
  - b. Mujer
2. Edad (años):
3. Lugar de trabajo (seleccionar UNA)
  - a. Hospital
  - b. Centro de diálisis
  - c. Ambos
4. Áreas de trabajo principales (varias opciones)
  - a. Enfermedad renal crónica no diálisis
  - b. Hemodiálisis
  - c. Diálisis peritoneal
  - d. Trasplante renal
5. Considera que el prurito asociado a ERC es un problema actual (sí/no)
6. ¿Cree que el prurito asociado a ERC está infradiagnosticado? (sí/no)
7. ¿Qué porcentaje aproximado de sus pacientes están diagnosticados con prurito asociado a ERC?
  - a. 0-10
  - b. 10-20
  - c. 20-40
  - d. 40-60
  - e. >60%
8. ¿Cómo diagnostica usted el prurito asociado a ERC? (opciones múltiples)
  - a. Lo manifiesta el paciente
  - b. Lo pregunto al paciente
  - c. Por medio de una escala o cuestionario
  - d. Otros (comentar): \_\_\_\_\_
9. Si usted utiliza una escala o cuestionario para diagnosticar prurito asociado a ERC especifique cuál: (texto libre)
10. En su práctica clínica habitual, el prurito asociado a ERC aparece como un diagnóstico codificado en la historia clínica del paciente? (sí/no)
11. Entre las diferentes causas implicadas en la fisiopatología del prurito asociado a ERC ¿cuál le parece la más relevante?
  - a. Toxinas urémicas
  - b. Neuropatía periférica
  - c. Desregulación del sistema inmune
  - d. Desregulación endorfinas-dinorfinas

12. ¿Considera que el prurito asociado a ERC es un síntoma importante que influye en la calidad de vida del paciente renal? (si/no)

13. Si un paciente tiene prurito ¿Qué tratamiento utiliza?

|                                       | 1ª línea                 | 2ª línea                 | 3ª línea                 | No lo utilizo            |
|---------------------------------------|--------------------------|--------------------------|--------------------------|--------------------------|
| a. Cremas hidratantes/anestésicas     | <input type="checkbox"/> | <input type="checkbox"/> | <input type="checkbox"/> | <input type="checkbox"/> |
| b. Antihistamínicos                   | <input type="checkbox"/> | <input type="checkbox"/> | <input type="checkbox"/> | <input type="checkbox"/> |
| c. Corticoides                        | <input type="checkbox"/> | <input type="checkbox"/> | <input type="checkbox"/> | <input type="checkbox"/> |
| d. Antagonistas/agonistas de opioides | <input type="checkbox"/> | <input type="checkbox"/> | <input type="checkbox"/> | <input type="checkbox"/> |
| e. Gabapentina/pregabalina            | <input type="checkbox"/> | <input type="checkbox"/> | <input type="checkbox"/> | <input type="checkbox"/> |
| f. Inmunosupresores                   | <input type="checkbox"/> | <input type="checkbox"/> | <input type="checkbox"/> | <input type="checkbox"/> |
| g. Antidepresivos                     | <input type="checkbox"/> | <input type="checkbox"/> | <input type="checkbox"/> | <input type="checkbox"/> |
| h. Fototerapia                        | <input type="checkbox"/> | <input type="checkbox"/> | <input type="checkbox"/> | <input type="checkbox"/> |
| i. Lo derivo al dermatólogo           | <input type="checkbox"/> | <input type="checkbox"/> | <input type="checkbox"/> | <input type="checkbox"/> |

14. ¿Considera que el prurito asociado a ERC es un problema que está solucionado con los tratamientos actuales?

a. si

b. no

i. Si la respuesta es no, ¿por qué motivo? (marca todas las opciones posibles)

1. Baja eficacia
2. Efectos secundarios indeseables
3. Baja adherencia
4. Otros: comentar
